# Supplementary material for: Breastfeeding promotion interventions and breastfeeding practices: a systematic review
Source: BMC Public Health. 2013 Sep 17;13(Suppl 3):S20. doi: 10.1186/1471-2458-13-S3-S20 (PMC3847366; doi:10.1186/1471-2458-13-S3-S20)
Supplement: Additional File 1 — Detailed quality of evidence tables for the subgroups. [file 1471-2458-13-S3-S20-S1.pdf]

Table 1: Summary of findings for effect of breastfeeding promotion interventions on exclusive breastfeeding rates.

|                                                                            |                                                                                                                     | Quality Assessment                                                                                                                                                 |                                                             |                                                                           |                                                      |              |         | Summary of Findings    |                                                                                                                                                                    |
|----------------------------------------------------------------------------|---------------------------------------------------------------------------------------------------------------------|--------------------------------------------------------------------------------------------------------------------------------------------------------------------|-------------------------------------------------------------|---------------------------------------------------------------------------|------------------------------------------------------|--------------|---------|------------------------|--------------------------------------------------------------------------------------------------------------------------------------------------------------------|
|                                                                            |                                                                                                                     |                                                                                                                                                                    |                                                             | Directness                                                                |                                                      | No of events |         |                        |                                                                                                                                                                    |
| No of studies                                                              | Design                                                                                                              | Limitations                                                                                                                                                        | Consistency                                                 | Generalizability to population of interest                                | Generalizability to intervention of interest         | Intervention | Control | Relative Risk (95% CI) | Comments                                                                                                                                                           |
| Rate of exclusive breastfeeding at day 1: low outcome-specific quality     |                                                                                                                     |                                                                                                                                                                    |                                                             |                                                                           |                                                      |              |         |                        |                                                                                                                                                                    |
| 15                                                                         | 6 RCTs (14, 40, 49, 70, 71, 74), 9 QE (21, 32, 45, 48, 56, 59, 64, 85, 88)                                          | Studies used different follow up periods and recall criteria. Mothers in the intervention group may have over-reported feeding practices.                          | 6 of 15 studies suggest benefit. Significant heterogeneity  | 10 out of 15 studies were conducted in developed countries                | Pooled results for different types of interventions. | 4093         | 6316    | 1.43 [1.09, 1.87]      | Random effects meta-analysis due to heterogeneity. The majority of studies used individual counseling as the intervention; most were facility and community-based. |
| 11                                                                         | 4 RCTs (14, 49, 70, 74), 7 QE (32, 45, 48, 56, 59, 64, 69)                                                          | None                                                                                                                                                               | 5 of 11 studies suggest benefit                             | 4 of 11 studies were conducted in developing countries                    | Effect of individual counseling                      | 3540         | 5772    | 1.60 [1.04, 2.48]      |                                                                                                                                                                    |
| 2                                                                          | 1 RCT(40), 1 QE (21)                                                                                                | Standard care for comparison group included optional breastfeeding classes, peer support groups and home visit.                                                    | None of the studies suggests benefit                        | 2 studies conducting in developed country.                                | Effect of group counseling                           | 503          | 503     | 1.00 [0.94, 1.07]      | Insignificant heterogeneity in this subgroup.                                                                                                                      |
| 2                                                                          | 2 RCTs (71, 74)                                                                                                     | None                                                                                                                                                               | 1 of 2 studies suggests benefit                             | Both studies were conducted in developed countries                        | Effect of individual and group counseling            | 50           | 41      | 1.37 [0.93, 2.00]      |                                                                                                                                                                    |
| 2                                                                          | 1 RCT, 1 QE (14, 59)                                                                                                | None                                                                                                                                                               | 1 of 2 studies suggests benefit                             | 1 study conducted in developed country                                    | Effect of community-based intervention               | 285          | 103     | 4.84 [0.30, 78.76]     |                                                                                                                                                                    |
| 5                                                                          | 1 RCT, 4 QE (21, 32, 45, 56, 71)                                                                                    | None                                                                                                                                                               | 3 of 5 studies suggest benefit                              | Only 1 study conducted in developed country; rest in developing countries | Effect of facility-based intervention                | 461          | 199     | 1.67 [1.17, 2.38]      |                                                                                                                                                                    |
| 7                                                                          | 4 RCTs, 3 QE (40, 48, 49, 64, 69, 70, 74)                                                                           | None                                                                                                                                                               | 2 of 7 studies suggest benefit                              | All studies conducted in developed countries                              | Effect of facility- and community-based intervention | 3347         | 6014    | 1.05 [0.81, 1.36]      |                                                                                                                                                                    |
| 5                                                                          | 1RCT, 4 QE (14, 21, 32, 45, 56)                                                                                     | None                                                                                                                                                               | 3 of 5 studies suggest benefit                              | Developing countries                                                      | Effect of intervention in developing countries       | 618          | 192     | 2.57 [1.39, 4.77]      | The majority of studies used individual counseling and were facility-based.                                                                                        |
| 9                                                                          | 5 RCTs, 4 QE (40, 48, 49, 59, 64, 69-71, 74)                                                                        | None                                                                                                                                                               | 3 of 9 studies suggest benefit                              | Developed countries                                                       | Effect of intervention in developed countries        | 3475         | 6124    | 1.11 [0.87, 1.41]      | The majority of studies were facility- and community-based.                                                                                                        |
| rate of exclusive breastfeeding at 0-1 month: Low outcome-specific quality |                                                                                                                     |                                                                                                                                                                    |                                                             |                                                                           |                                                      |              |         |                        |                                                                                                                                                                    |
| 30                                                                         | 22 RCTs, 8 QE (13, 17-19, 21, 22, 33, 38, 39, 41, 42, 45, 52, 53, 55-57, 60, 61, 65, 66, 68, 71-74, 76, 81, 84, 85) | Studies used different follow up periods. Recall criteria variable across studies (past 24 hr, past week or previous month). Mothers in the intervention group may | 15 of 30 studies suggest benefit. Significant heterogeneity | 16 of 30 studies were conducted in developed countries                    | Pooled results for different types of interventions  | 1512         | 1276    | 1.30 [1.19, 1.42]      | Random effects meta-analysis due to heterogeneity.<br><br>The majority of studies used individual counseling                                                       |

|                                                                                    |                                                                                                           |                                                                                                                                                                                                            |                                                             |                                                        |                                                      |      |      |                   |                                                                                                                                                                   |
|------------------------------------------------------------------------------------|-----------------------------------------------------------------------------------------------------------|------------------------------------------------------------------------------------------------------------------------------------------------------------------------------------------------------------|-------------------------------------------------------------|--------------------------------------------------------|------------------------------------------------------|------|------|-------------------|-------------------------------------------------------------------------------------------------------------------------------------------------------------------|
|                                                                                    |                                                                                                           | have over-reported feeding practices.                                                                                                                                                                      |                                                             |                                                        |                                                      |      |      |                   | as the intervention; most were facility and community-based.                                                                                                      |
| 24                                                                                 | 19 RCTs, 5 QE (13, 17, 18, 33, 38, 39, 41, 42, 45, 52, 53, 55, 56, 60, 61, 65, 66, 68, 72-74, 76, 81, 85) |                                                                                                                                                                                                            | 12 of 24 studies suggest benefit                            | 13 of 24 studies were conducted in developed countries | Effect of individual counseling                      | 1167 | 973  | 1.31 [1.17, 1.46] |                                                                                                                                                                   |
| 3                                                                                  | 1 RCT, 2 QE (56, 57, 84)                                                                                  |                                                                                                                                                                                                            | 1 of 3 studies suggests benefit                             | 2 of 3 studies were conducted in developed countries   | Effect of group counseling                           | 102  | 90   | 1.56 [0.83, 2.93] | All studies had facility-based interventions.                                                                                                                     |
| 5                                                                                  | 4 RCTs, 1 QE (19, 22, 57, 71, 74)                                                                         |                                                                                                                                                                                                            | 2 of 5 studies suggest benefit                              | 3 of 5 studies were conducted in developed countries   | Effect of individual and group counseling            | 243  | 213  | 1.27 [1.09, 1.49] | Most studies had facility and community-based interventions.                                                                                                      |
| 2                                                                                  | 2 RCTs (13, 18)                                                                                           |                                                                                                                                                                                                            | 1 of 2 studies suggests benefit                             | 1 of 2 studies conducted in developed country          | Effect of community-based intervention               | 165  | 86   | 1.78 [0.73, 4.37] |                                                                                                                                                                   |
| 13                                                                                 | 9 RCTs, 4 QE (21, 45, 52, 53, 55-57, 61, 68, 71, 76, 84, 85)                                              |                                                                                                                                                                                                            | 7 of 13 studies suggest benefit                             | 6 of 13 studies were conducted in developed countries  | Effect of facility-based intervention                | 647  | 550  | 1.26 [1.11, 1.43] |                                                                                                                                                                   |
| 15                                                                                 | 11 RCTs, 4 QE (17, 19, 22, 33, 38, 39, 41, 42, 60, 65, 66, 72-74, 81)                                     |                                                                                                                                                                                                            | 7 of 15 studies suggest benefit                             | 9 of 15 studies were conducted in developed countries  | Effect of facility- and community-based intervention | 700  | 640  | 1.31 [1.14, 1.50] | The majority of studies used individual counseling.                                                                                                               |
| 14                                                                                 | 9 RCTs, 6 QE (13, 19, 21, 22, 33, 39, 42, 45, 52, 55, 56, 76, 81, 85)                                     |                                                                                                                                                                                                            | 7 of 14 studies suggest benefit                             | Developing countries                                   | Effect of intervention in developing countries       | 706  | 607  | 1.35 [1.15, 1.58] | The majority of studies used individual counseling.                                                                                                               |
| 16                                                                                 | 14 RCTs, 2 QE (17, 18, 38, 41, 53, 57, 60, 61, 65, 66, 68, 71-74, 84)                                     | One study (57) included predominant BF in the category of EBF                                                                                                                                              | 8 of 16 studies suggest benefit                             | Developed countries                                    | Effect of intervention in developed countries        | 806  | 669  | 1.26 [1.13, 1.41] | Most studies used individual counseling and were facility- and community-based.                                                                                   |
| <b>rate of exclusive breastfeeding at 1-6 months: low outcome-specific quality</b> |                                                                                                           |                                                                                                                                                                                                            |                                                             |                                                        |                                                      |      |      |                   |                                                                                                                                                                   |
| 53                                                                                 | 34 RCTs, 19 QE (11-14, 19, 20, 22, 33-38, 40-52, 54, 57-59, 61-65, 67, 69, 71-83, 85-87)                  | Variable follow up periods used in studies. Recall criteria variable across studies (past 24 hr, past week or previous month). Mothers in the intervention group may have over-reported feeding practices. | 21 of 53 studies suggest benefit. Significant heterogeneity | 29 of 53 studies were conducted in developed countries | Pooled results for different types of interventions  | 5481 | 4897 | 1.90 [1.54, 2.34] | Random effects meta-analysis due to heterogeneity. The majority of studies used individual counseling as the intervention; most were facility and community-based |
| 39                                                                                 | 28 RCTs, 11 QE (12-14, 33, 35, 37, 38, 41-50, 52, 54, 58, 59, 61-65, 67, 69, 72-74, 76, 80-83, 85-87)     |                                                                                                                                                                                                            | 13 of 39 studies suggest benefit                            | 24 of 39 studies were conducted in developed countries | Effect of individual counseling                      | 3440 | 3320 | 1.90 [1.34, 2.68] |                                                                                                                                                                   |
| 6                                                                                  | 3 RCTs, 3 QE (20, 40, 51, 57, 75, 78)                                                                     |                                                                                                                                                                                                            | 3 of 6 studies suggest benefit                              | 4 of 6 studies were conducted in developed countries   | Effect of group counseling                           | 298  | 151  | 1.80 [1.18, 2.74] |                                                                                                                                                                   |

|    |                                                                                                |                                                                                           |                                  |                                                        |                                                      |      |      |                   |                                                                                 |
|----|------------------------------------------------------------------------------------------------|-------------------------------------------------------------------------------------------|----------------------------------|--------------------------------------------------------|------------------------------------------------------|------|------|-------------------|---------------------------------------------------------------------------------|
| 10 | 6 RCTs, 4 QE (11, 19, 22, 34, 36, 57, 71, 74, 77, 79)                                          | One study (79) allowed supplemental feeding of less than 2 ounces to be grouped with EBF. | 6 of 10 studies suggest benefit  | 5 of 10 studies were conducted in developing countries | Effect of individual and group counseling            | 1743 | 1426 | 2.01 [1.43, 2.82] |                                                                                 |
| 14 | 9 RCTs, 5 QE (11, 13, 14, 35-37, 43, 44, 50, 51, 59, 62, 78, 87)                               |                                                                                           | 10 of 14 studies suggest benefit | 8 of 14 studies were conducted in developing countries | Effect of community-based intervention               | 1737 | 656  | 2.59 [1.80, 3.73] | Most studies used individual counseling.                                        |
| 19 | 13 RCTs, 6 QE (12, 20, 45, 47, 52, 54, 57, 58, 61, 67, 71, 72, 75-77, 79, 80, 82, 85)          |                                                                                           | 4 of 19 studies suggest benefit  | 11 of 19 studies were conducted in developed countries | Effect of facility-based intervention                | 1418 | 420  | 1.87 [1.26, 2.78] | Most studies used individual counseling.                                        |
| 20 | 13 RCTs, 7 QE (19, 22, 33, 34, 38, 40-42, 46, 48, 49, 63-65, 69, 73, 74, 81, 83, 86)           |                                                                                           | 7 of 20 studies suggest benefit  | 13 of 20 studies were conducted in developed countries | Effect of facility- and community-based intervention | 2326 | 3821 | 1.47 [1.08, 1.99] | Most studies used individual counseling.                                        |
| 24 | 14 RCTs, 10 QE (11-14, 19, 22, 33-37, 42, 45-47, 52, 75, 76, 78-81, 85, 87)                    |                                                                                           | 16 of 24 studies suggest benefit | Developing countries                                   | Effect of intervention in developing countries       | 3797 | 1909 | 2.88 [2.11, 3.93] | Most studies used individual counseling.                                        |
| 29 | 22 RCTs, 7 QE (20, 38, 40, 41, 43, 44, 48-51, 54, 57-59, 61-65, 67, 69, 71-74, 77, 82, 83, 86) | 2 studies (57, 82) included predominant BF in the category of EBF                         | 5 of 29 studies suggest benefit  | Developed countries                                    | Effect of intervention in developed countries        | 1684 | 2988 | 1.31 [1.00, 1.70] | Most studies used individual counseling and were facility- and community-based. |

**Table 2: Summary of findings for effect of breastfeeding promotion interventions on predominant and partial breastfeeding rates.**

| Quality Assessment                                                                       |                                                                    |                                                                                                                                                                                                           |                                                                  |                                                        |                                                     | Summary of Findings |         |                        |                                                                                                                                |
|------------------------------------------------------------------------------------------|--------------------------------------------------------------------|-----------------------------------------------------------------------------------------------------------------------------------------------------------------------------------------------------------|------------------------------------------------------------------|--------------------------------------------------------|-----------------------------------------------------|---------------------|---------|------------------------|--------------------------------------------------------------------------------------------------------------------------------|
|                                                                                          |                                                                    |                                                                                                                                                                                                           |                                                                  | Directness                                             |                                                     | No of events        |         |                        |                                                                                                                                |
| No of studies                                                                            | Design                                                             | Limitations                                                                                                                                                                                               | Consistency                                                      | Generalizability to population of interest             | Generalizability to intervention of interest        | Intervention        | Control | Relative Risk (95% CI) | Comments                                                                                                                       |
| rate of predominant breastfeeding at 0-1 month: <i>Moderate outcome-specific quality</i> |                                                                    |                                                                                                                                                                                                           |                                                                  |                                                        |                                                     |                     |         |                        |                                                                                                                                |
| 6                                                                                        | 5 RCTs, 1 QE (18, 52, 61, 72, 76, 85)                              | Variable follow up periods used in studies. Recall criteria variable across studies (past 24 hr, past week or previous month). mothers in the intervention group may have over-reported feeding practices | None of the studies suggest benefit. Insignificant heterogeneity | 3 studies were conducted in developing countries       | Pooled results for different types of interventions | 33                  | 59      | 0.66 [0.43, 1.01]      | Fixed effects meta-analysis; insignificant heterogeneity. Most studies were facility-based and all used individual counseling. |
| 6                                                                                        | 5 RCTs, 1 QE (18, 52, 61, 72, 76, 85)                              |                                                                                                                                                                                                           | None of the studies suggest benefit                              | 3 studies were conducted in developing countries       | Effect of individual counseling                     | 33                  | 59      | 0.66 [0.43, 1.01]      | Fixed effects meta-analysis; insignificant heterogeneity. Most studies had facility-based interventions.                       |
| 1                                                                                        | 1 RCT (18)                                                         | Low event rate                                                                                                                                                                                            |                                                                  | Developed country                                      | Effect of community-based intervention              | 4                   | 6       | 0.63 [0.18, 2.17]      | All studies used individual counseling.                                                                                        |
| 5                                                                                        | 4 RCTs, 1 QE (52, 61, 72, 76, 85)                                  |                                                                                                                                                                                                           | None of the studies suggest benefit.                             | 3 of 5 studies were conducted in developing countries  | Effect of facility-based intervention               | 29                  | 53      | 0.66 [0.42, 1.04]      | Most studies used individual counseling.                                                                                       |
| 3                                                                                        | 2 RCTs, 1 QE (52, 76, 85)                                          |                                                                                                                                                                                                           | None of the studies suggest benefit                              | Developing countries                                   | Effect of intervention in developing countries      | 26                  | 39      | 0.67 [0.42, 1.06]      | All studies were facility-based and used individual counseling.                                                                |
| 3                                                                                        | 3 RCTs (18, 61, 72)                                                |                                                                                                                                                                                                           | None of the studies suggest benefit                              | Developed countries                                    | Effect of intervention in developed countries       | 7                   | 20      | 0.63 [0.23, 1.72]      | All studies used individual counseling.                                                                                        |
| rate of predominant breastfeeding at 1- 6 months: <i>low outcome specific-quality</i>    |                                                                    |                                                                                                                                                                                                           |                                                                  |                                                        |                                                     |                     |         |                        |                                                                                                                                |
| 13                                                                                       | 10 RCTs, 3 QE (11, 12, 18, 20, 36, 42, 46, 52, 58, 61, 72, 76, 85) | Variable follow up periods used in studies. Recall criteria variable across studies (past 24 hr, past week or previous month). mothers in the intervention group may have over-reported feeding practices | 2 studies suggest benefit. Significant heterogeneity             | 8 of 13 studies were conducted in developed countries  | Pooled results for different types of interventions | 1433                | 707     | 1.08 [0.55, 2.13]      | Random effects meta-analysis due to significant heterogeneity. Most studies are facility-based and used individual counseling. |
| 10                                                                                       | 8 RCTs, 2 QE (12, 18, 42, 46, 52, 58, 61, 72, 76, 85)              |                                                                                                                                                                                                           | 2 studies suggest benefit                                        | 6 of 10 studies were conducted in developing countries | Effect of individual counseling                     | 1309                | 473     | 1.34 [0.62, 2.90]      | Most studies had facility-based interventions.                                                                                 |
| 1                                                                                        | 1 RCT (20)                                                         | No events. Small sample size                                                                                                                                                                              | -                                                                | Study was conducted in developed country               | Effect of group counseling                          | 0                   | 0       | -                      | The study used a facility-based intervention.                                                                                  |

|                                                                             |                                               |                                                                                                                                                                                                            |                                                            |                                                       |                                                      |      |     |                    |                                                                                                                                      |
|-----------------------------------------------------------------------------|-----------------------------------------------|------------------------------------------------------------------------------------------------------------------------------------------------------------------------------------------------------------|------------------------------------------------------------|-------------------------------------------------------|------------------------------------------------------|------|-----|--------------------|--------------------------------------------------------------------------------------------------------------------------------------|
| 2                                                                           | 1 RCT, 1 QE (11, 36)                          | In one study (11), follow-up assessment 1 year after intervention leading to recall bias                                                                                                                   | None of the studies suggest benefit                        | Both studies were conducted in developing countries   | Effect of individual and group counseling            | 124  | 234 | 0.48 [0.12, 1.94]  | All studies had community-based interventions.                                                                                       |
| 3                                                                           | 2 RCTs, 1 QE (11, 18, 36)                     | In one study (11), follow-up assessment 1 year after intervention leading to recall bias                                                                                                                   | None of the studies suggest benefit                        | 2 of 3 studies were conducted in developing countries | Effect of community-based intervention               | 125  | 243 | 0.36 [0.10, 1.26]  | Most studies used individual and group counseling.                                                                                   |
| 8                                                                           | 7 RCTs, 1 QE (12, 20, 52, 58, 61, 72, 76, 85) |                                                                                                                                                                                                            | 2 studies suggest effect of benefit                        | 4 of 8 studies were conducted in developing countries | Effect of facility-based intervention                | 1160 | 333 | 2.26 [0.77, 6.67]  | Most studies used individual counseling.                                                                                             |
| 2                                                                           | 1 RCT, 1 QE (42, 46)                          |                                                                                                                                                                                                            | None of the studies suggest benefit                        | 1 of 2 studies was conducted in a developing country  | Effect of facility- and community-based intervention | 148  | 131 | 0.72 [0.23, 2.26]  | All studies used individual counseling.                                                                                              |
| 8                                                                           | 5 RCTs, 3 QE (11, 12, 36, 42, 46, 52, 76, 85) | In one study (Dearden 2002), follow-up assessment 1 year after intervention leading to recall bias                                                                                                         | 2 studies suggest benefit                                  | Developing countries                                  | Effect of intervention in developing countries       | 1246 | 516 | 1.23 [0.49, 3.08]  | Most studies used individual counseling and 4 of 8 were facility-based.                                                              |
| 5                                                                           | 5 RCTs (18, 20, 58, 61, 72)                   |                                                                                                                                                                                                            | None of the studies suggest benefit                        | Developed countries                                   | Effect of intervention in developed countries        | 187  | 191 | 0.80 [0.26, 2.48]  | Most studies used individual counseling.                                                                                             |
| <b>rate of partial breastfeeding at day 1: low outcome-specific quality</b> |                                               |                                                                                                                                                                                                            |                                                            |                                                       |                                                      |      |     |                    |                                                                                                                                      |
| 6                                                                           | 2 RCT, 4 QE (45, 49, 59, 64, 71, 89)          | Variable follow up periods used in studies. Recall criteria variable across studies (past 24 hr, past week or previous month). Mothers in the intervention group may have over-reported feeding practices. | 1 of 6 studies suggests benefit. Significant heterogeneity | 1 of 6 studies was conducted in a developing country  | Pooled results for different types of interventions  | 101  | 99  | 1.21 [0.79, 1.87]  | Random effects meta-analysis due to significant heterogeneity. Most studies used individual counseling and most were facility-based. |
| 5                                                                           | 1 RCT, 4 QE (45, 49, 59, 64, 89)              |                                                                                                                                                                                                            | 1 of 5 studies suggests benefit.                           | 1 of 5 studies was conducted in a developing country  | Effect of individual counseling                      | 98   | 92  | 1.32 [0.84, 2.08]  |                                                                                                                                      |
| 1                                                                           | 1 RCT (71)                                    | Small sample size (<50)                                                                                                                                                                                    | -                                                          | Study conducted in developed country                  | Effect of individual and group counseling            | 3    | 7   | 0.48 [0.14, 1.66]  | The study was a facility-based intervention.                                                                                         |
| 1                                                                           | 1 QE (59)                                     |                                                                                                                                                                                                            | -                                                          | Study conducted in developed country                  | Effect of community-based intervention               | 16   | 4   | 4.25 [1.43, 12.61] | The study used individual counseling.                                                                                                |
| 3                                                                           | 1 RCT, 2 QE (45, 71, 89)                      |                                                                                                                                                                                                            | No significant effect observed in any study.               | 1 of 3 studies was conducted in a developing country  | Effect of facility-based intervention                | 41   | 49  | 0.84 [0.63, 1.13]  | Insignificant heterogeneity in this subgroup. Most studies used individual counseling.                                               |
| 2                                                                           | 1 RCT, 1 QE (49, 64)                          |                                                                                                                                                                                                            | No significant effect observed in any study.               | Both studies were conducted in developed countries    | Effect of facility- and community-based intervention | 44   | 46  | 1.29 [0.88, 1.90]  | Insignificant heterogeneity in this subgroup                                                                                         |
| 1                                                                           | 1 QE (45)                                     |                                                                                                                                                                                                            | -                                                          | Developing countries                                  | Effect of intervention in developing countries       | 31   | 37  | 0.84 [0.61, 1.15]  | The study had individual counseling and was facility-based.                                                                          |
| 5                                                                           | 2 RCTs, 3 QE (49, 59, 64, 71, 89)             |                                                                                                                                                                                                            | 1 of 5 studies suggests benefit.                           | Developed countries                                   | Effect of intervention in developed countries        | 70   | 62  | 1.40 [0.83, 2.35]  | Most studies used individual counseling.                                                                                             |

| rate of partial breastfeeding at 0-1 month: moderate outcome-specific quality  |                                                                                           |                                                                                                                                                                                                            |                                                                  |                                                          |                                                       |     |     |                   |                                                                                                                                      |
|--------------------------------------------------------------------------------|-------------------------------------------------------------------------------------------|------------------------------------------------------------------------------------------------------------------------------------------------------------------------------------------------------------|------------------------------------------------------------------|----------------------------------------------------------|-------------------------------------------------------|-----|-----|-------------------|--------------------------------------------------------------------------------------------------------------------------------------|
| 11                                                                             | 8 RCTs, 3 QE (18, 19, 45, 52, 61, 66, 71, 72, 76, 85, 88)                                 | Variable follow up periods used in studies. Recall criteria variable across studies (past 24 hr, past week or previous month). mothers in the intervention group may have over-reported feeding practices. | None of the studies suggest benefit. Insignificant heterogeneity | 5 of 11 studies were conducted in developing countries   | Pooled results for different types of interventions   | 112 | 151 | 0.88 [0.72, 1.08] | Fixed effects meta-analysis; insignificant heterogeneity. Most studies used individual counseling and most were facility-based.      |
| 9                                                                              | 7 RCTs, 2 QE (18, 45, 52, 61, 66, 72, 76, 85, 88)                                         |                                                                                                                                                                                                            | No significant effect observed in any study.                     | 4 of 9 studies were conducted in developing countries    | Effect of individual counseling                       | 108 | 130 | 0.90 [0.73, 1.11] | Most studies were facility-based.                                                                                                    |
| 2                                                                              | 1 RCT, 1 QE (19, 71)                                                                      |                                                                                                                                                                                                            | None of the studies suggest benefit                              | 1 of 2 studies were conducted in developing countries    | Effect of individual and group counseling             | 4   | 21  | 0.48 [0.16, 1.38] |                                                                                                                                      |
| 1                                                                              | 1 RCT (18)                                                                                |                                                                                                                                                                                                            | -                                                                | Study was conducted in a developed country               | Effect of community-based interventions               | 17  | 18  | 0.89 [0.48, 1.64] | The study used individual counseling.                                                                                                |
| 8                                                                              | 6 RCTs, 2 QE (45, 52, 61, 71, 72, 76, 85, 88)                                             |                                                                                                                                                                                                            | No significant effect observed in any study.                     | 4 of 8 studies were conducted in developing countries    | Effect of facility-based interventions                | 91  | 110 | 0.92 [0.74, 1.16] | Most studies used individual counseling.                                                                                             |
| 2                                                                              | 1 RCT, 1 QE (19, 66)                                                                      |                                                                                                                                                                                                            | None of the studies suggest benefit                              | 1 of 2 studies was conducted in a developing country     | Effect of facility- and community-based interventions | 4   | 23  | 0.34 [0.13, 0.93] | One study used individual counseling.                                                                                                |
| 5                                                                              | 2 RCTs, 3 QE (19, 45, 52, 76, 85)                                                         |                                                                                                                                                                                                            | None of the studies suggest benefit                              | Developing countries                                     | Effect of intervention in developing countries        | 57  | 79  | 0.94 [0.72, 1.24] | Both studies used individual counseling and were facility-based.                                                                     |
| 6                                                                              | 6 RCTs (18, 61, 64, 66, 71, 88)                                                           |                                                                                                                                                                                                            | No significant effect observed in any study.                     | Developed countries                                      | Effect of intervention in developed countries         | 55  | 72  | 0.80 [0.59, 1.10] | Most studies used individual counseling.                                                                                             |
| rate of partial breastfeeding at 1-6 months: moderate outcome-specific quality |                                                                                           |                                                                                                                                                                                                            |                                                                  |                                                          |                                                       |     |     |                   |                                                                                                                                      |
| 20                                                                             | 11 RCTs, 9 QE (18-20, 36, 42, 45, 47, 49, 51, 52, 59, 61, 62, 71, 72, 76, 80, 85, 86, 89) | Variable follow up periods used in studies. Recall criteria variable across studies (past 24 hr, past week or previous month). mothers in the intervention group may have over-reported feeding practices. | None of the studies suggest benefit. Significant heterogeneity   | 9 of 20 studies were conducted in developing countries   | Pooled results for different types of interventions   | 524 | 578 | 0.87 [0.75, 1.02] | Random effects meta-analysis due to significant heterogeneity. Most studies used individual counseling and most were facility-based. |
| 15                                                                             | 8 RCTs, 7 QE (18, 42, 45, 47, 49, 52, 59, 61, 62, 72, 76, 80, 85, 86, 89)                 |                                                                                                                                                                                                            | None of the studies suggest benefit. Insignificant heterogeneity | 7 of 15 studies were conducted in developing countries   | Effect of individual counseling                       | 402 | 421 | 0.93 [0.80, 1.09] | Insignificant heterogeneity in this subgroup. Most studies were facility-based.                                                      |
| 2                                                                              | 1 RCT, 1 QE (20, 51)                                                                      |                                                                                                                                                                                                            | None of the studies suggest benefit. Insignificant heterogeneity | 1 of the 2 studies was conducted in a developing country | Effect of group counseling                            | 19  | 23  | 0.59 [0.30, 1.15] | Insignificant heterogeneity in this subgroup                                                                                         |
| 3                                                                              | 2 RCTs, 1 QE (19, 36, 71)                                                                 |                                                                                                                                                                                                            | None of the studies suggest benefit                              | 2 of 3 studies were conducted in developing              | Effect of individual and group counseling             | 103 | 134 | 0.82 [0.51, 1.31] |                                                                                                                                      |

|    |                                                           |  |                                                                    |                                                        |                                                       |     |     |                   |                                                                                               |
|----|-----------------------------------------------------------|--|--------------------------------------------------------------------|--------------------------------------------------------|-------------------------------------------------------|-----|-----|-------------------|-----------------------------------------------------------------------------------------------|
|    |                                                           |  |                                                                    | countries                                              |                                                       |     |     |                   |                                                                                               |
| 5  | 3 RCTs, 2 QE (18, 36, 51, 59, 62)                         |  | None of the studies suggest benefit                                | 4 of 5 studies were conducted in developed countries   | Effect of community-based interventions               | 130 | 162 | 0.71 [0.50, 1.00] | Insignificant heterogeneity in this subgroup                                                  |
| 11 | 7 RCTs, 4 QE (20, 45, 47, 52, 61, 71, 72, 76, 80, 85, 89) |  | None of the studies suggest benefit                                | 6 of 11 studies were conducted in developing countries | Effect of facility-based interventions                | 308 | 318 | 0.93 [0.75, 1.16] | Most studies used individual counseling.                                                      |
| 4  | 1 RCT, 3 QE (19, 42, 49, 86)                              |  | No significant effect observed in any study.                       | 2 of 4 studies were conducted in developing countries  | Effect of facility- and community-based interventions | 86  | 98  | 0.94 [0.75, 1.17] | Insignificant heterogeneity in this subgroup. Most studies used individual counseling.        |
| 9  | 4 RCTs, 5 QE (19, 36, 42, 45, 47, 52, 76, 80, 85)         |  | None of the studies suggest benefit                                | Developing countries                                   | Effect of intervention in developing countries        | 337 | 380 | 0.83 [0.65, 1.06] | Both studies had individual counseling and were facility-based.                               |
| 11 | 7 RCTs, 4 QE (18, 20, 49, 51, 59, 61, 62, 71, 72, 86, 89) |  | None of the studies suggest benefit<br>Insignificant heterogeneity | Developed countries                                    | Effect of intervention in developed countries         | 187 | 198 | 0.94 [0.79, 1.12] | Insignificant heterogeneity in this subgroup.<br><br>Most studies used individual counseling. |

**Table 3: Summary of findings for effect of breastfeeding promotion interventions on 'no breastfeeding' rates.**

|                                                                 |                                                                                                                                                         | Quality Assessment                                                                                                             |                                                         |                                                         |                                                       |              |         | Summary of Findings    |                                                                                                                                                                                                                                    |
|-----------------------------------------------------------------|---------------------------------------------------------------------------------------------------------------------------------------------------------|--------------------------------------------------------------------------------------------------------------------------------|---------------------------------------------------------|---------------------------------------------------------|-------------------------------------------------------|--------------|---------|------------------------|------------------------------------------------------------------------------------------------------------------------------------------------------------------------------------------------------------------------------------|
|                                                                 |                                                                                                                                                         |                                                                                                                                |                                                         | Directness                                              |                                                       | No of events |         |                        |                                                                                                                                                                                                                                    |
| No of studies                                                   | Design                                                                                                                                                  | Limitations                                                                                                                    | Consistency                                             | Generalizability to population of interest              | Generalizability to intervention of interest          | Intervention | Control | Relative Risk (95% CI) | Comments                                                                                                                                                                                                                           |
| rate of no breastfeeding at day 1: low outcome-specific quality |                                                                                                                                                         |                                                                                                                                |                                                         |                                                         |                                                       |              |         |                        |                                                                                                                                                                                                                                    |
| 38                                                              | 21 RCTs, 17 QE (11, 13, 14, 17, 33, 36, 37, 44, 49, 59, 63, 64, 68-71, 74, 78, 79, 89-91, 96, 100, 103, 107, 108, 110, 111, 113, 117, 120-122, 124-127) | Variable follow up periods used in studies. Recall criteria variable across studies (past 24 hr, past week or previous month). | Most studies suggest benefit. Significant heterogeneity | 10 of 38 studies were conducted in developing countries | Pooled results for different types of interventions   | 48026        | 39843   | 0.68 [0.54, 0.87]      | Random effects meta-analysis due to significant heterogeneity<br><br>Most studies used individual counseling and most were facility and community-based.<br><br>Effect of benefit refers to decrease in numbers not breastfeeding. |
| 27                                                              | 15 RCTs, 12 QE (13, 14, 17, 33, 37, 44, 49, 59, 63, 64, 68-70, 74, 89-91, 103, 107, 108, 110, 111, 113, 120-122, 125)                                   |                                                                                                                                | Half of studies suggest benefit                         | 5 of 27 studies were conducted in developing countries  | Effect of individual counseling                       | 46766        | 37039   | 0.73 [0.55, 0.96]      | Most studies were facility and community-based.                                                                                                                                                                                    |
| 3                                                               | 1 RCT, 2 QE (78, 117, 124)                                                                                                                              |                                                                                                                                | Consistent effect of benefit in all studies             | 1 of 3 studies was conducted in developing countries    | Effect of group counseling                            | 87           | 172     | 0.57 [0.41, 0.80]      | Most studies were facility-based.                                                                                                                                                                                                  |
| 9                                                               | 5 RCTs, 4 QE (11, 36, 71, 74, 79, 96, 100, 126, 127)                                                                                                    |                                                                                                                                | Most studies suggest benefit                            | 4 of 9 studies were conducted in developing countries   | Effect of individual and group counseling             | 1173         | 2632    | 0.64 [0.39, 1.04]      |                                                                                                                                                                                                                                    |
| 9                                                               | 4 RCTs, 5 QE (11, 13, 14, 36, 37, 59, 78, 96, 100)                                                                                                      |                                                                                                                                | Half of studies suggest benefit                         | 7 of 9 studies were conducted in developing countries   | Effect of community-based interventions               | 1748         | 3536    | 0.74 [0.51, 1.07]      |                                                                                                                                                                                                                                    |
| 11                                                              | 6 RCTs, 5 QE (68, 71, 79, 89, 90, 110, 111, 117, 120, 122, 124)                                                                                         |                                                                                                                                | Almost all studies suggest benefit                      | 2 of 11 studies were conducted in developing countries  | Effect of facility-based interventions                | 327          | 483     | 0.48 [0.34, 0.69]      |                                                                                                                                                                                                                                    |
| 18                                                              | 10 RCTs, 8 QE (17, 33, 44, 49, 63, 64, 69, 70, 74, 91, 103, 107, 108, 113, 121, 125-127)                                                                |                                                                                                                                | Most studies suggest benefit                            | 1 of 18 studies were conducted in developing countries  | Effect of facility- and community-based interventions | 45951        | 35824   | 0.81 [0.58, 1.12]      |                                                                                                                                                                                                                                    |
| 10                                                              | 6 RCTs, 4 QE (11, 13, 14, 33, 36, 37, 78, 79, 100, 122)                                                                                                 |                                                                                                                                | 8 of 10 studies suggest benefit                         | Developing countries                                    | Effect of intervention in developing countries        | 1487         | 2559    | 0.58 [0.44, 0.78]      |                                                                                                                                                                                                                                    |
| 28                                                              | 15 RCTs, 13 QE (17, 44, 49, 59, 63, 64, 68-71, 74, 89-91, 96, 103, 107, 108, 110, 111, 113, 117, 120, 121, 124-127)                                     |                                                                                                                                | 10 of 28 studies suggest benefit                        | Developed countries                                     | Effect of intervention in developed countries         | 46539        | 37284   | 0.73 [0.57, 0.95]      |                                                                                                                                                                                                                                    |

| rate of no breastfeeding at 0-1 month: <i>low outcome-specific quality</i>  |                                                                                                                                                                                                      |                                                                                                                                |                                                             |                                                            |                                                       |       |       |                   |                                                                                                         |
|-----------------------------------------------------------------------------|------------------------------------------------------------------------------------------------------------------------------------------------------------------------------------------------------|--------------------------------------------------------------------------------------------------------------------------------|-------------------------------------------------------------|------------------------------------------------------------|-------------------------------------------------------|-------|-------|-------------------|---------------------------------------------------------------------------------------------------------|
| 33                                                                          | 21 RCTs, 12 QE (10, 18, 19, 38, 45, 52, 53, 61, 63, 66, 68, 71-74, 76, 88, 90, 91, 93, 95, 98, 99, 101-103, 106, 113, 117, 118, 120, 124, 128)                                                       | Variable follow up periods used in studies. Recall criteria variable across studies (past 24 hr, past week or previous month). | 10 of 33 studies suggest benefit. Significant heterogeneity | 4 of 33 studies were conducted in developing countries     | Pooled results for different types of interventions   | 770   | 1018  | 0.70 [0.62, 0.80] | Random effects meta-analysis due to significant heterogeneity. Most studies used individual counseling. |
| 26                                                                          | 19 RCTs, 7 QE (10, 18, 38, 45, 52, 53, 61, 63, 66, 68, 72-74, 76, 88, 90, 91, 93, 98, 101, 103, 106, 113, 118, 120, 128)                                                                             |                                                                                                                                | 7 of 26 studies suggest benefit.                            | 3 of 26 studies were conducted in developing countries     | Effect of individual counseling                       | 603   | 829   | 0.71 [0.61, 0.84] |                                                                                                         |
| 3                                                                           | 1 RCT, 2 QE (99, 117, 124)                                                                                                                                                                           |                                                                                                                                | 2 of 3 studies suggest benefit.                             | All in developed countries                                 | Effect of group counseling                            | 75    | 91    | 0.71 [0.51, 0.99] | Most studies were facility-based.                                                                       |
| 5                                                                           | 2 RCTs, 3 QE (19, 71, 74, 95, 102)                                                                                                                                                                   |                                                                                                                                | 1 of 5 studies suggests benefit                             | 1 out of 5 studies were conducted in developing countries  | Effect of individual and group counseling             | 92    | 98    | 0.66 [0.51, 0.87] |                                                                                                         |
| 3                                                                           | 2 RCTs, 1 QE (18, 101, 106)                                                                                                                                                                          |                                                                                                                                | 1 of 3 studies suggest benefit                              | All in developed countries                                 | Effect of community-based interventions               | 137   | 151   | 0.90 [0.51, 1.57] |                                                                                                         |
| 16                                                                          | 11 RCTs, 5 QE (45, 52, 53, 61, 68, 71, 76, 88, 90, 98, 99, 102, 117, 120, 124, 128)                                                                                                                  |                                                                                                                                | 6 of 16 studies suggest benefit.                            | 3 out of 16 studies were conducted in developing countries | Effect of facility-based interventions                | 334   | 490   | 0.68 [0.56, 0.83] |                                                                                                         |
| 14                                                                          | 8 RCTs, 6 QE (10, 19, 38, 63, 66, 72-74, 91, 93, 95, 103, 113, 118)                                                                                                                                  |                                                                                                                                | 3 of 14 studies suggest benefit.                            | 1 out of 14 studies was conducted in a developing country  | Effect of facility- and community-based interventions | 299   | 377   | 0.67 [0.54, 0.83] |                                                                                                         |
| 4                                                                           | 2 RCTs, 2 QE (19, 45, 52, 76)                                                                                                                                                                        |                                                                                                                                | 1 study suggests benefit                                    | Developing countries                                       | Effect of intervention in developing countries        | 16    | 34    | 0.51 [0.29, 0.90] |                                                                                                         |
| 29                                                                          | 19 RCTs, 10 QE (10, 18, 38, 53, 61, 63, 66, 68, 71-74, 88, 90, 91, 93, 95, 98, 99, 101-103, 106, 113, 117, 118, 120, 124, 128)                                                                       |                                                                                                                                | 9 of 29 studies suggest benefit.                            | Developed countries                                        | Effect of intervention in developed countries         | 754   | 984   | 0.71 [0.62, 0.81] |                                                                                                         |
| rate of no breastfeeding at 1-6 months: <i>low outcome-specific quality</i> |                                                                                                                                                                                                      |                                                                                                                                |                                                             |                                                            |                                                       |       |       |                   |                                                                                                         |
| 73                                                                          | 41 RCTs, 32 QE (10, 12, 13, 17-20, 35, 36, 38, 40-42, 44, 45, 47, 49, 51, 52, 54, 58, 59, 61-64, 67-69, 71-74, 76, 78-83, 86, 90-93, 95-99, 101, 103-106, 108-110, 112-121, 123, 124, 126, 129, 130) | Variable follow up periods used in studies. Recall criteria variable across studies (past 24 hr, past week or previous month). | 25 of 73 studies suggest benefit. Significant heterogeneity | 16 of 73 studies were conducted in developing countries    | Pooled results for different types of interventions   | 15473 | 17578 | 0.82 [0.77, 0.89] | Random effects meta-analysis due to significant heterogeneity. Most studies used individual counseling. |

|    |                                                                                                                                                                                                                 |  |                                  |                                                         |                                                       |       |       |                   |                                                 |
|----|-----------------------------------------------------------------------------------------------------------------------------------------------------------------------------------------------------------------|--|----------------------------------|---------------------------------------------------------|-------------------------------------------------------|-------|-------|-------------------|-------------------------------------------------|
| 53 | 37 RCTs, 16 QE (10, 12, 13, 17, 18, 35, 38, 41, 42, 44, 45, 47, 49, 52, 54, 58, 59, 61-64, 67-69, 72-74, 76, 79, 81-83, 86, 90, 91, 93, 97, 98, 101, 103, 105, 106, 108, 110, 112, 113, 118-121, 123, 129, 130) |  | 15 of 53 studies suggest benefit | 11 of 53 studies were conducted in developing countries | Effect of individual counseling                       | 14375 | 14943 | 0.86 [0.79, 0.94] |                                                 |
| 10 | 3 RCTs, 7 QE (20, 40, 51, 78, 92, 99, 109, 115, 117, 124)                                                                                                                                                       |  | 3 of 10 studies suggest benefit  | 2 of 10 studies were conducted in developing countries  | Effect of group counseling                            | 449   | 503   | 0.76 [0.63, 0.91] | Most studies were facility-based.               |
| 11 | 3 RCTs, 8 QE (19, 36, 71, 74, 80, 95, 96, 104, 114, 116, 126)                                                                                                                                                   |  | 9 of 11 studies suggest benefit  | 3 of 11 studies were conducted in developing countries  | Effect of individual and group counseling             | 649   | 2132  | 0.68 [0.51, 0.91] | Most studies were facility and community-based. |
| 12 | 7 RCTs, 5 QE (13, 18, 35, 36, 51, 59, 62, 78, 96, 101, 105, 106)                                                                                                                                                |  | 3 of 12 studies suggest benefit  | 4 of 12 studies were conducted in developing countries  | Effect of community-based interventions               | 1263  | 2782  | 0.89 [0.75, 1.06] | Most studies used individual counseling.        |
| 31 | 21 RCTs, 10 QE (12, 20, 45, 47, 52, 54, 58, 61, 67, 68, 71, 72, 76, 79, 80, 82, 90, 92, 98, 99, 109, 110, 115-117, 119, 120, 123, 124, 129, 130)                                                                |  | 9 of 31 studies suggest benefit  | 8 of 31 studies were conducted in developing countries  | Effect of facility-based interventions                | 5548  | 6515  | 0.82 [0.75, 0.89] | Most studies used individual counseling.        |
| 31 | 13 RCTs, 18 QE (10, 17, 19, 38, 40-42, 44, 49, 63, 64, 69, 72-74, 81, 83, 86, 91, 93, 95, 97, 103, 104, 108, 112-114, 118, 121, 126)                                                                            |  | 13 of 31 studies suggest benefit | 4 of 31 studies were conducted in developing countries  | Effect of facility- and community-based interventions | 8804  | 8538  | 0.83 [0.75, 0.93] | Most studies used individual counseling.        |
| 16 | 8 RCTs, 8 QE (12, 13, 19, 35, 36, 42, 45, 47, 52, 76, 78-81, 92, 97)                                                                                                                                            |  | 10 of 16 studies suggest benefit | Developing countries                                    | Effect of intervention in developing countries        | 4710  | 5708  | 0.56 [0.45, 0.69] | Most studies used individual counseling.        |
| 57 | 33 RCTs, 24 QE (10, 17, 18, 20, 38, 40, 41, 44, 49, 51, 54, 58, 59, 61-64, 67-69, 71-74, 82, 83, 86, 90, 91, 93, 95, 96, 98, 99, 101, 103-106, 108-110, 112-121, 123, 124, 126, 129, 130)                       |  | 15 of 57 studies suggest benefit | Developed countries                                     | Effect of intervention in developed countries         | 10905 | 12127 | 0.88 [0.82, 0.95] | Most studies used individual counseling.        |
